# Supplementary material
Source: publisher site journal article supplement (https://www.dovepress.com/get_supplementary_file.php?f=274744.docx)
Supplement: Supplementary file 1 [file get_supplementary_file.php]

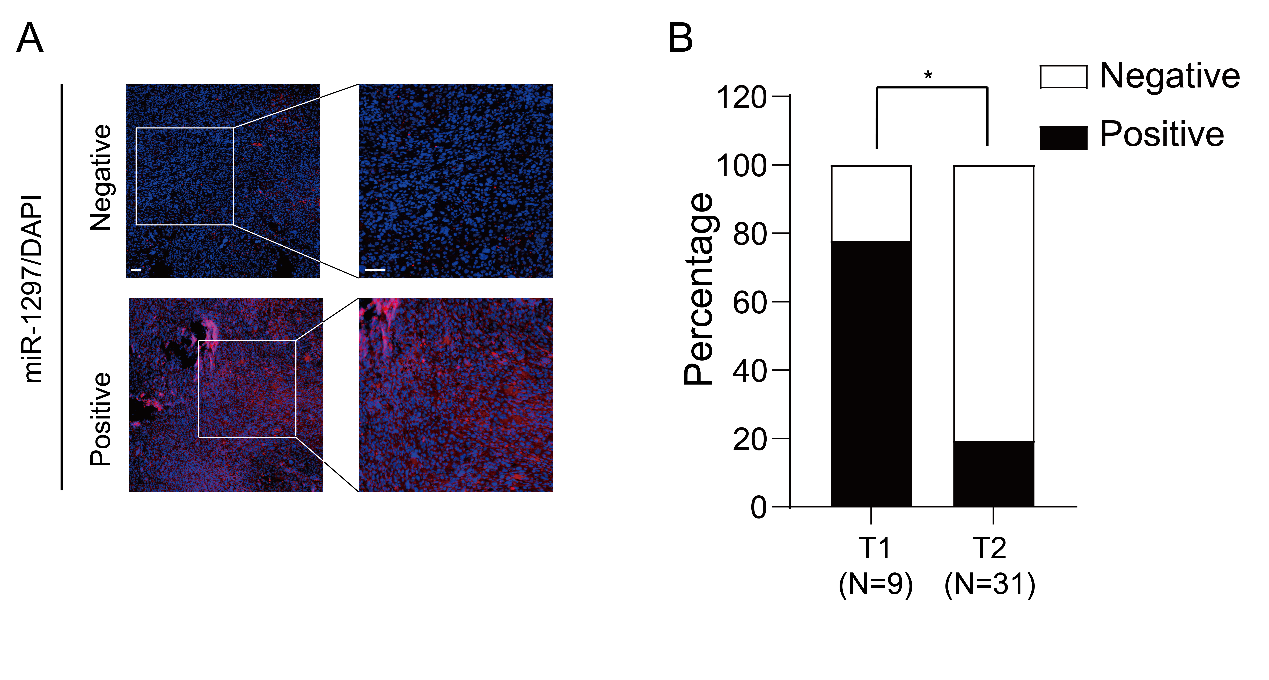


**Supplementary Figure 1.** MiR-1297 exhibited significantly high expression in OS tissues. A. Representative photographs of the expression patterns of miR-1297 in huamn OS tissues by FISH. Scale bars = 50 μm. B. Statistical analysis of FISH results based on the expression level of miR-1297 in T1 stage (n=9) and T2 stage (n=31) OS tissues. **p* < 0.05 (Student's t-test).
